# Supplementary material for: Synergetic enhancement of organic solar cell thermal stability by wire bar coating and light processing
Source: Royal Society of Chemistry journal article supplement (doi:10.1039/c5tc01624j), 2015-01-01
Supplement: c5tc01624j1.pdf [file c5tc01624j1.pdf]

## Supplementary Information

### Synergetic Enhancement of Organic Solar Cell Thermal Stability by Wire Bar Coating and Light Processing

Ching-Hong Tan, Him Cheng Wong, Zhe Li, David G. Bucknall, James R. Durrant\*  
and João T. Cabral\*

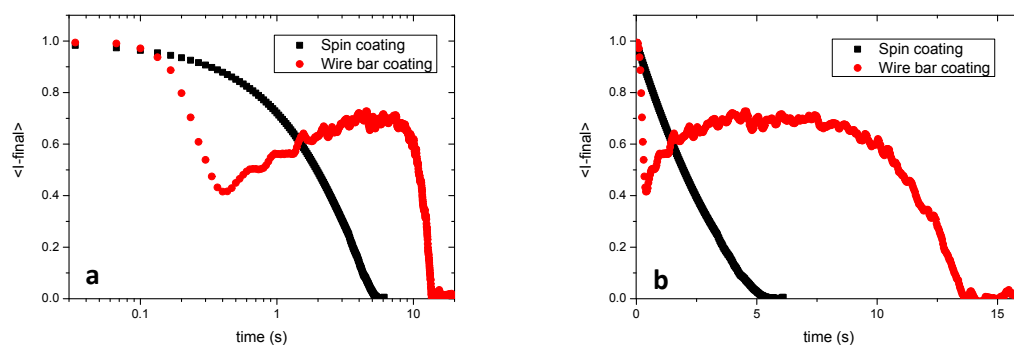

**Figure S1:** Normalized transmitted light intensity obtained by insitu monitoring of film formation during SC and WBC film formation of PCDTBT:PC<sub>60</sub>BM. 'Drying time' was estimated by cessation of intensity changes. Data plotted in (a) logarithmic and (b) linear scales for clarity.

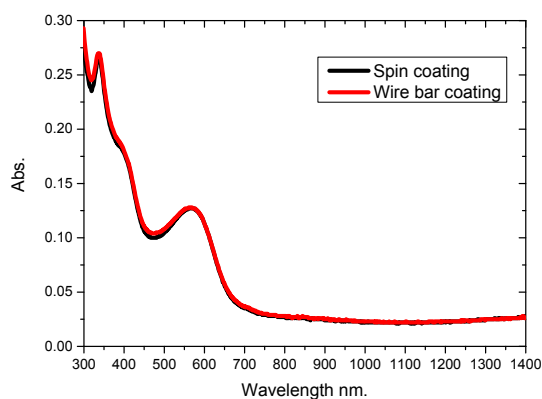

**Figure S2:** UV-Vis absorption spectra of SC and WBC PCDTBT:PC<sub>60</sub>BM films

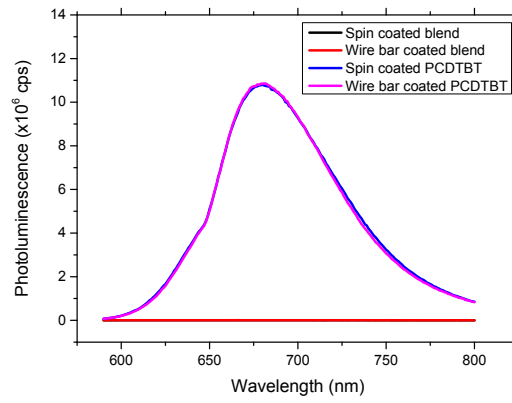

**Figure S3:** Photoluminescence (PL) emission spectra of SC and WBC PCDTBT:PC<sub>60</sub>BM blend and PCDTBT films.

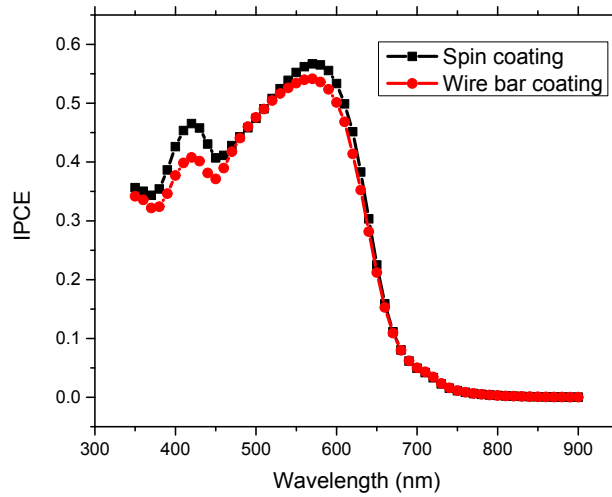

**Figure S4:** External Quantum Efficiency (EQE) of SC and WBC PCDTBT:PC<sub>60</sub>BM devices.

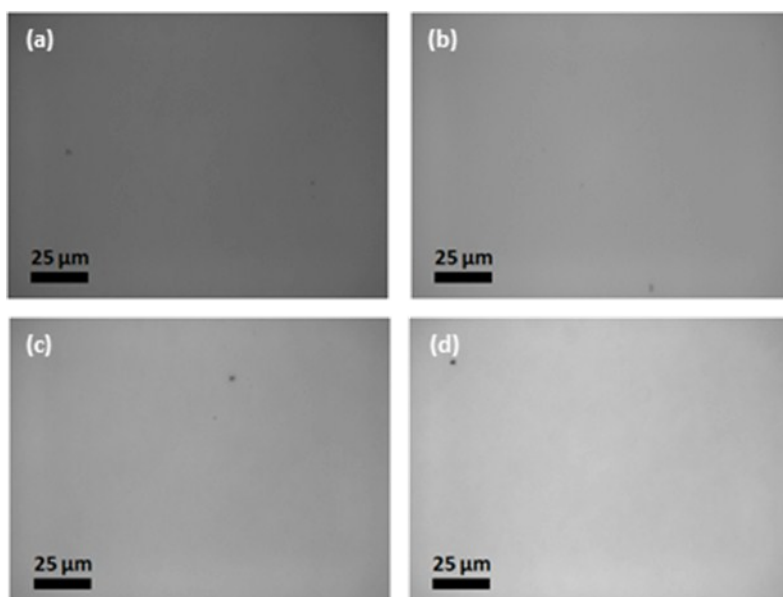

**Figure S5:** PCDTBT:PC<sub>60</sub>BM system coated on PEDOT:PSS annealing at 80 °C in conditions: (a) SC dark, (b) SC light, (c) WBC dark & (d) WBC light.

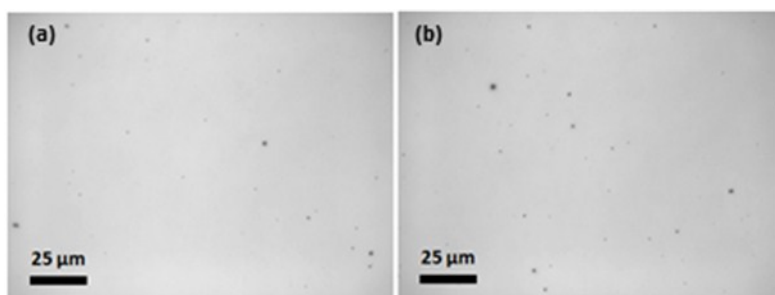

**Figure S6:** PCDTBT:PC<sub>60</sub>BM blend as cast using (a) SC and (b) WBC techniques on SiO<sub>x</sub> substrates.

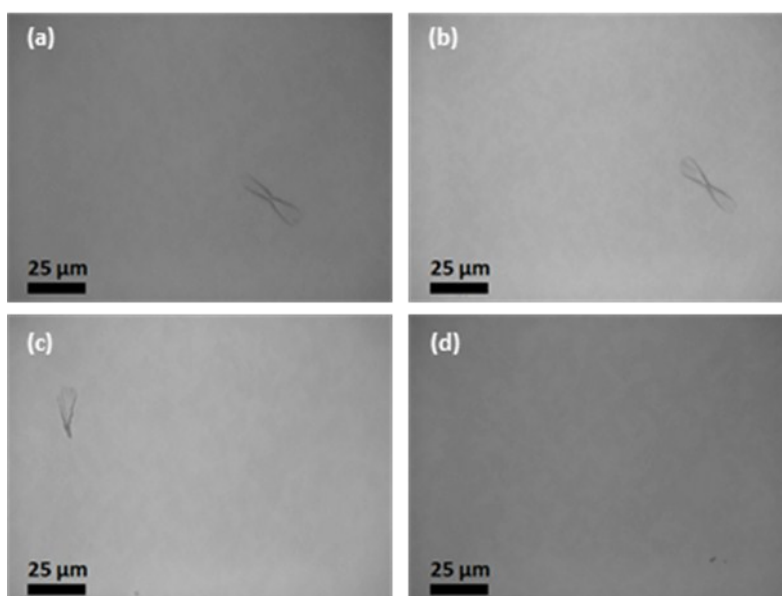

**Figure S7:** PCDTBT:PC<sub>60</sub>BM coated on PEDOT:PSS annealing at 140 °C in conditions: (a) SC dark, (b) SC light, (c) WBC dark & (d) WBC light.
